# Supplementary material
Source: Springer Nature journal article supplement (https://www.springermedizin.de/resource/supplementary/13054_2014_2562_MOESM3_ESM.pdf/9714210)

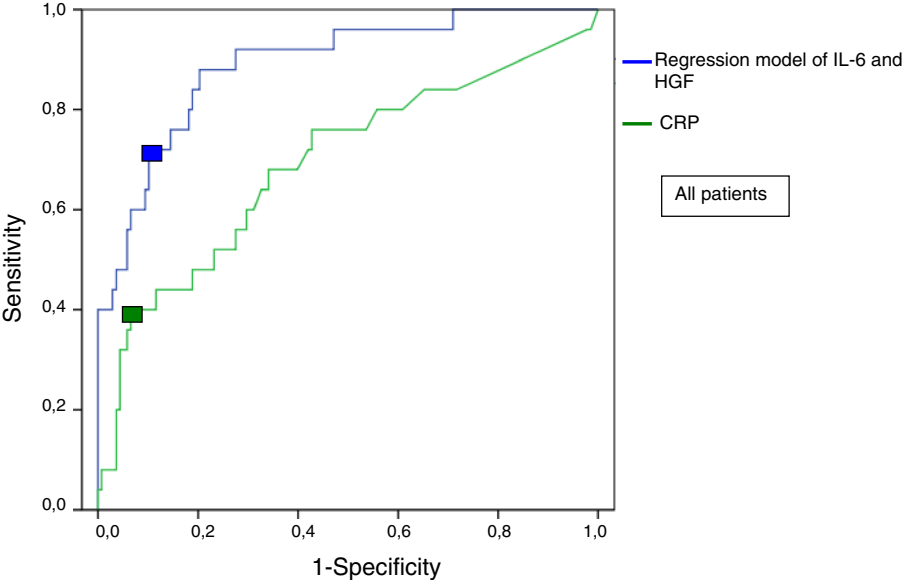

Supplement: MOESM3 [file 9714210]
